# Supplementary material
Source: HighWire-hosted journal article supplement (https://erj.ersjournals.com/content/58/1/2100959)
Supplement: inline-supplementary-material-1 [file inline-supplementary-material-1.pdf]

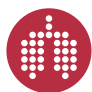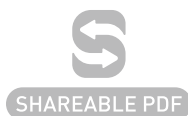

# Is the new WHO definition of extensively drug-resistant tuberculosis easy to apply in practice?

Riccardo Alagna <sup>1</sup>, Andrea Maurizio Cabibbe <sup>1</sup>, Paolo Miotto <sup>1</sup>, Francesca Saluzzo <sup>1</sup>,  
Claudio Umberto Köser <sup>2</sup>, Stefan Niemann<sup>3,4</sup>, Sebastien Gagneux<sup>5,6</sup>, Camilla Rodrigues<sup>7</sup>,  
Paola Vittoria Maria Rancoita<sup>8</sup> and Daniela Maria Cirillo <sup>1</sup>

<sup>1</sup>IRCCS San Raffaele Scientific Institute, Milan, Italy. <sup>2</sup>Dept of Genetics, University of Cambridge, Cambridge, UK. <sup>3</sup>Molecular and Experimental Mycobacteriology, Priority Area Infections, Research Center Borstel, Borstel, Germany. <sup>4</sup>German Center for Infection Research (DZIF), Partner site Hamburg-Lübeck-Borstel-Riems, Germany. <sup>5</sup>Swiss Tropical and Public Health Institute, Basel, Switzerland. <sup>6</sup>University of Basel, Basel, Switzerland. <sup>7</sup>Dept of Microbiology, P. D. Hinduja Hospital and Medical Research Centre, Mumbai, India. <sup>8</sup>University Centre of Statistics in the Biomedical Sciences, Vita-Salute San Raffaele University, Milan, Italy.

Daniela Maria Cirillo ([cirillo.daniela@hsr.it](mailto:cirillo.daniela@hsr.it))

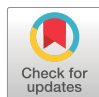

Shareable abstract (@ERSpublications)

The new definition of extensively drug resistant tuberculosis endorsed by WHO poses some challenges that must be addressed in a coordinated fashion by researchers, TB control stakeholders and assay developers <https://bit.ly/3eAMU8B>

**Cite this article as:** Alagna R, Cabibbe AM, Miotto P, et al. Is the new WHO definition of extensively drug-resistant tuberculosis easy to apply in practice?. *Eur Respir J* 2021; 58: 2100959 [DOI: 10.1183/13993003.00959-2021].

This single-page version can be shared freely online.

Copyright ©The authors 2021. For reproduction rights and permissions contact [permissions@ersnet.org](mailto:permissions@ersnet.org)

Received: 31 March 2021  
Accepted: 22 April 2021

*To the Editor:*

The World Health Organization (WHO) recently endorsed a new definition of extensively drug-resistant tuberculosis (XDR-TB) and, for the first time, introduced the category of pre-XDR-TB [1]. Pre-XDR-TB is defined as multidrug resistance/rifampicin resistance (MDR/RR) in conjunction with resistance to any fluoroquinolone (levofloxacin or moxifloxacin), whereas the conditions for XDR-TB are now met by additional resistance to a group A drug (bedaquiline or linezolid) [1].

Copyright ©The authors 2021. For reproduction rights and permissions contact [permissions@ersnet.org](mailto:permissions@ersnet.org)
